# Supplementary material for: Decision-making factors related to palliative care and hospice use in the community: a systematic review based on Andersen’s behavioural model of health services use
Source: Research Square preprint supplement (doi:10.21203/rs.3.rs-6021185/v1), 2025-04-14
Supplement: Supplementary file 1 [file 123063ed77010e81aac36baf.pdf]

**Table. Full Search Terms for Databases**

| <b>CINAHL Subject headings</b>                                                                                | <b>Emtree</b>                                        | <b>Ovid MeSH terms</b>                                                                                                          | <b>Cochrane MeSH terms</b>                                                                                                      | <b>Free terms</b>                                                                                                                                                                                                                                                                                                                                                                            |
|---------------------------------------------------------------------------------------------------------------|------------------------------------------------------|---------------------------------------------------------------------------------------------------------------------------------|---------------------------------------------------------------------------------------------------------------------------------|----------------------------------------------------------------------------------------------------------------------------------------------------------------------------------------------------------------------------------------------------------------------------------------------------------------------------------------------------------------------------------------------|
| Palliative Medicine, Palliative Care, Palliative Care Nursing, Terminal Care, Hospice Care, Life Support Care | Palliative therapy, Terminal care, Long term care,   | Palliative care, Hospice care, Terminal care, Patient comfort, Hospices, Life support care, Hospice and palliative care nursing | Palliative care, Hospice care, Terminal care, Patient comfort, Hospices, Life Support care, Hospice and Palliative care nursing | Palliative care*, Palliative therap*, Palliative treatment*, Supportive care*, Hospice*, End of life care*, Comfort care*, Palliative nurs*, Palliative care nurs*, EOL care*, Terminal care*                                                                                                                                                                                                |
| Decision-making, Judgment, Patient participation, Patient preference                                          | Decision making, Patient participation               | Decision making, Judgment, Choice behavior, Patient participation, Patient preference                                           | Decision making, Judgment, Choice behavior, Patient participation, Patient preference                                           | Decision making, Decision process, Patient decision*, Judgement, Judgment, Patient choice*, Choice making, Choice behavior*, Patient participation, Patient preference*                                                                                                                                                                                                                      |
| Terminally ill patients                                                                                       | Terminally ill patients                              | Terminally ill                                                                                                                  | Terminally ill                                                                                                                  | End stage, End of life, Terminally ill*                                                                                                                                                                                                                                                                                                                                                      |
| Community health nursing, Home health care, Home health nursing, Nursing homes, Home nursing                  | Community care, Home care, Visiting nursing services | Community Health services, Nursing homes, Long-term care, Home care services, Home health nursing, Home nursing                 | Community health services, Nursing homes, Long-term care, Home care services, Home health nursing, Home nursing                 | Community health service*, Community health care*, Community healthcare*, Community health nurs*, Community based, Nursing home*, Long term care*,<br><br>Home care*, Homecare*, Home based, Home nurs*, Home service*,<br><br>Home treatment*,<br><br>Home visit nurs*,<br><br>Visiting nurs* service*, Home health*,<br><br>Home healthcare, Home health care, Homehealth, Homehealth care |
