# Supplementary material for: Decision-making factors related to palliative care and hospice use in the community: a systematic review based on Andersen’s behavioural model of health services use
Source: Research Square preprint supplement (doi:10.21203/rs.3.rs-6021185/v1), 2025-04-14
Supplement: Supplementary file 2 [file 38753715b208eba346c4623e.pdf]

**Table. Factors for Using Palliative Care and Hospice**

| <b>Study number</b> | <b>Decision-making factor</b>                | <b>Subjects<br/>(Patient/Caregiver)</b> | <b>Components</b>                        |
|---------------------|----------------------------------------------|-----------------------------------------|------------------------------------------|
| #1                  | Acknowledgement of their terminal status     | Patient                                 | Need factor<br>(Self-assessed)           |
|                     | Physician's disclosure                       | Patient                                 | Enabling factor                          |
|                     | Knowledge of hospice                         | Caregiver                               | Need factor<br>(Self-assessed)           |
|                     | Perception about patient's receptivity       | Caregiver                               | Need factor<br>(Self-assessed)           |
|                     | Personal experience about death              | Caregiver                               | Predisposing factor                      |
| #2                  | Age                                          | Patient                                 | Predisposing factor                      |
|                     | Education level                              | Patient                                 | Predisposing factor                      |
|                     | Number of people in the household            | Patient                                 | Predisposing factor                      |
|                     | Comorbid condition                           | Patient                                 | Need factor<br>(Professionally assessed) |
|                     | ADL                                          | Patient                                 | Need factor<br>(Professionally assessed) |
| #3                  | Early realistic communication                | Caregiver                               | Enabling factor                          |
|                     | Pt/FCG-healthcare professional communication | Patient and Caregiver                   | Enabling factor                          |
| #4                  | Pt-FCG communication                         | Patient and Caregiver                   | Enabling factor                          |
|                     | Providing information about options          | Caregiver                               | Enabling factor                          |
|                     | Patient's desire                             | Patient                                 | Need factor<br>(Preference)              |

|    |                                                          |                          |                                             |
|----|----------------------------------------------------------|--------------------------|---------------------------------------------|
| #5 | Commitment to patient's end-of-life wish                 | Caregiver                | Need factor<br>(Preference)                 |
|    | Maintaining normalcy                                     | Patient and<br>Caregiver | Need factor<br>(Preference)                 |
|    | Previous negative experiences with<br>institutional care | Patient and<br>Caregiver | Predisposing factor                         |
| #6 | Knowledge about dying process                            | Caregiver                | Need factor<br>(Self-assessed)              |
|    | End-of-life wish                                         | Patient                  | Need factor<br>(Preference)                 |
|    | Understanding of the effect of PC/hospice                | Caregiver                | Enabling factor<br>(Self-assessed)          |
|    | Discussion with others                                   | Caregiver                | Enabling factor                             |
| #7 | End-of-life wish                                         | Patient                  | Need factor<br>(Preference)                 |
|    | FCG-healthcare professional<br>communication             | Caregiver                | Enabling factor                             |
|    | Deteriorating health condition                           | Patient                  | Need factor<br>(Professionally<br>assessed) |
|    | Preference for dying at home                             | Patient                  | Need factor<br>(Preference)                 |

---

ADL: Activities of daily living, FCG: Family caregiver, Pt: Patient
