# Supplementary material for: Decision-making factors related to palliative care and hospice use in the community: a systematic review based on Andersen’s behavioural model of health services use
Source: Research Square preprint supplement (doi:10.21203/rs.3.rs-6021185/v1), 2025-04-14
Supplement: Supplementary file 3 [file 7f93988339a1740d985f8844.pdf]

**Table. The Example of Search Strategy in Ovid Medline**

| #         | Query                                                                                                                                                                                                                                                                                                                                                                                                                                            | Results from<br>24 Oct 2024 |
|-----------|--------------------------------------------------------------------------------------------------------------------------------------------------------------------------------------------------------------------------------------------------------------------------------------------------------------------------------------------------------------------------------------------------------------------------------------------------|-----------------------------|
| <b>1</b>  | exp Hospice Care/ or exp Palliative Care/ or exp Terminal Care/ or exp Patient Comfort/ or exp Hospices/ or exp "Hospice and Palliative Care Nursing"/                                                                                                                                                                                                                                                                                           | 115,457                     |
| <b>2</b>  | ("palliative care*" or "palliative therap*" or "palliative treatment*" or "supportive care*" or "hospice*" or "end of life care" or "comfort care*" or "palliative nurs*" or "palliative care nurs*" or "EOL care*" or "terminal care*").ab,ti.                                                                                                                                                                                                  | 91,412                      |
| <b>3</b>  | exp terminally ill/                                                                                                                                                                                                                                                                                                                                                                                                                              | 6,875                       |
| <b>4</b>  | ("terminally ill" or "end stage" or "end of life").ab,ti.                                                                                                                                                                                                                                                                                                                                                                                        | 123,982                     |
| <b>5</b>  | exp decision making/ or exp Judgment/ or exp choice behavior/ or exp Patient Participation/ or exp Patient Preference/                                                                                                                                                                                                                                                                                                                           | 291,960                     |
| <b>6</b>  | ("decision making" or "decision process" or "patient decision*" or "judgement" or "judgment" or "patient choice*" or "choice making" or "choice behavior*" or "patient participation" or "patient preference*").ab,ti.                                                                                                                                                                                                                           | 275,243                     |
| <b>7</b>  | exp Community Health Services/ or exp nursing homes/ or exp Long-Term Care/ or exp Home Care Services/ or exp Home Health Nursing/ or exp Home Nursing/                                                                                                                                                                                                                                                                                          | 403,344                     |
| <b>8</b>  | ("community health service*" or "community health care*" or "community healthcare*" or "community health nurs*" or "community based" or "nursing home*" or "long term care*" or "home care*" or "homecare*" or "home based" or "home nurs*" or "home service*" or "home treatment*" or "home visit nurs*" or "visiting nurs* service*" or "home health*" or "home healthcare" or "home health care" or "homehealth" or "homehealth care").ab,ti. | 190,742                     |
| <b>9</b>  | 1 or 2                                                                                                                                                                                                                                                                                                                                                                                                                                           | 159,229                     |
| <b>10</b> | 3 or 4                                                                                                                                                                                                                                                                                                                                                                                                                                           | 128,209                     |
| <b>11</b> | 5 or 6                                                                                                                                                                                                                                                                                                                                                                                                                                           | 500,566                     |
| <b>12</b> | 7 or 8                                                                                                                                                                                                                                                                                                                                                                                                                                           | 517,685                     |
| <b>13</b> | 9 and 10 and 11 and 12                                                                                                                                                                                                                                                                                                                                                                                                                           | 1,399                       |
